# Supplementary material
Source: MDPI journal article supplement (https://www.mdpi.com/2079-9284/9/2/34)
Supplement: s1 [file s1]

**Table S1.** Summary of formulation components and functions of key ingredients. Blue cells indicate inclusion of the ingredient in the product(s) within the range.

| Ingredient                                                                      | Function                                                                                    | Cleanser | Toner                 | Eye                                                 | Serum                             | Day                            |                      | Night                |
|---------------------------------------------------------------------------------|---------------------------------------------------------------------------------------------|----------|-----------------------|-----------------------------------------------------|-----------------------------------|--------------------------------|----------------------|----------------------|
|                                                                                 |                                                                                             |          |                       |                                                     |                                   | No SPF                         | SPF                  |                      |
| <i>Ophiopogon japonicus</i> root extract                                        | Helps to reduce skin sensitivity                                                            |          |                       |                                                     |                                   |                                |                      |                      |
| <i>Nephelium lappaceum</i> leaf extract                                         | Targets wrinkles, firmness and elasticity                                                   |          |                       |                                                     |                                   |                                |                      |                      |
| <i>Crataegus Monogyna</i> Flower Extract, <i>Jasminum Sambac</i> Flower Extract | Targets under eye dark circles and puffiness                                                |          |                       |                                                     |                                   |                                |                      |                      |
| Humectants                                                                      | Attract and retain hydration in the stratum corneum                                         | Glycerin | Glycerin, Propanediol | Glycerin, Betaine                                   | Glycerin, Betaine                 | Glycerin, Propanediol, Betaine | Propanediol, Betaine | Glycerin             |
| Emollients                                                                      | Softens and smooths skin                                                                    |          |                       | Caprylic/capric triglyceride, Shea butter, Squalane | Dicaprylyl carbonate, Shea butter | Squalane, Cupuacu butter       |                      | Shea butter, Oat Oil |
| Lipid layer enhancers                                                           | Help to enhance the lipid bilayers of the stratum corneum                                   |          |                       |                                                     |                                   |                                |                      |                      |
| <i>Panthenol</i>                                                                | Helps to hydrate and soothe skin                                                            |          |                       |                                                     |                                   |                                |                      |                      |
| <i>Caelsapinia Spinosa</i> Fruit Extract, <i>Kappaphycus Alvarezii</i> Extract  | Form a protective film to prevent adhesion of pollution particles                           |          |                       |                                                     |                                   |                                |                      |                      |
| UV filters                                                                      | UV protection                                                                               |          |                       |                                                     |                                   |                                |                      |                      |
| Mild Surfactants                                                                | Designed to gently cleanse                                                                  |          |                       |                                                     |                                   |                                |                      |                      |
| <i>Tocopheryl Acetate</i>                                                       | Protect against free radical damage, maintaining the lipid integrity of the stratum corneum |          |                       |                                                     |                                   |                                |                      |                      |
